# Supplementary material
Source: publisher figshare collection journal article supplement (https://sage.figshare.com/ndownloader/files/15592625)
Supplement: Supplementary file 1 [file 15592625]

**Appendix 1: The distribution of plenary parliamentary questions among members of (Flemish and Francophone) party groups (GINI-coefficients for party groups per year)[[1]](#footnote-1)**


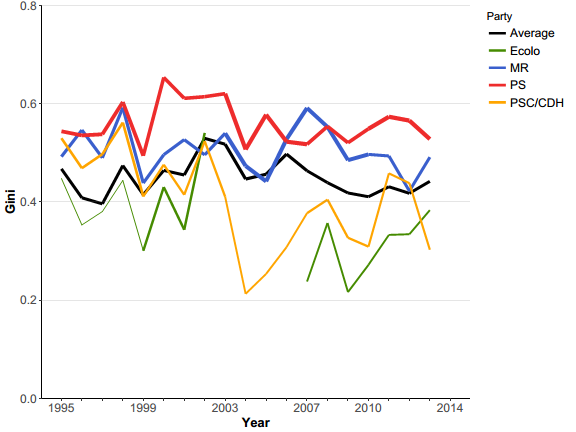


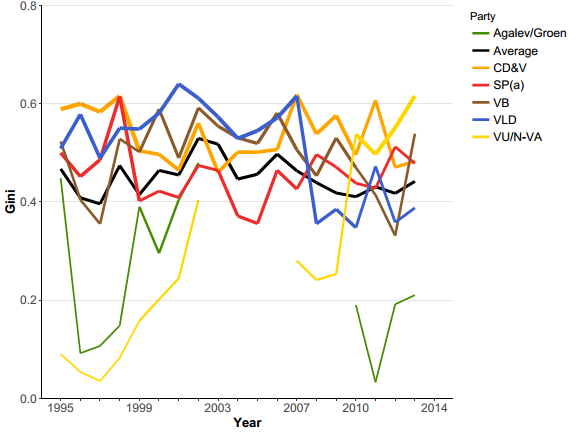


1. As the Gini-coefficient is to a certain degree sensitive for party group size, the thickness of the lines in the Figures shows how large a party group was at that moment in time (thinner line=small party group, thicker line= large party group). [↑](#footnote-ref-1)
